# Supplementary material for: The YfiBNR Signal Transduction Mechanism Reveals Novel Targets for the Evolution of Persistent Pseudomonas aeruginosa in Cystic Fibrosis Airways
Source: PubMed Central journal article supplement (PMC3375315; doi:10.1371/journal.ppat.1002760), 2012-06-14

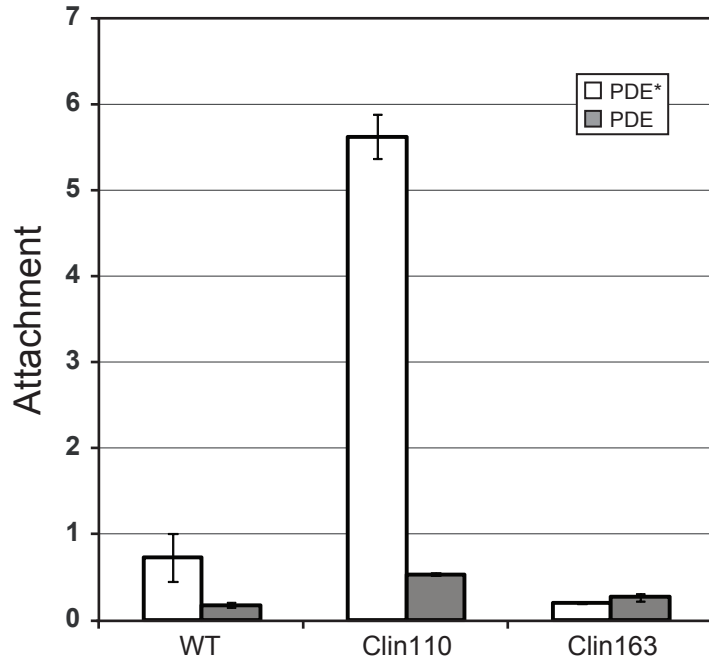

Supplement: ppat.1002760.s004.pdf [file ppat.1002760.s004.pdf]
