# Supplementary material for: The YfiBNR Signal Transduction Mechanism Reveals Novel Targets for the Evolution of Persistent Pseudomonas aeruginosa in Cystic Fibrosis Airways
Source: PubMed Central journal article supplement (PMC3375315; doi:10.1371/journal.ppat.1002760), 2012-06-14
Supplement: ppat.1002760.s005.pdf [file ppat.1002760.s005.pdf]

YfiN PAS domain

|                          |                                                              |     |
|--------------------------|--------------------------------------------------------------|-----|
| PA01 YfiN                | SYTVEAAVVEGDAQAAEESLALIASSEEVSSAIVYDRQGQTLASWHRESTGPLHL----- | 115 |
| <i>opitutis</i>          | AINSTAALAFDNPEAAAEILGALRAEPDVAAAVIYTSTGVSFARYP--AKLSAED----- | 106 |
| <i>acidobacter</i>       | AANSVSALEFNDPESARQTLRALAASPVEGAGLLTPDGQLFAEYWRSDVVRVNV-----  | 108 |
| <i>rhodothermus</i>      | TEHSVAPLVEQDAQAASEVLEGVRSIPAVQIAALYTADGRLFAWYLG--GLPATA----- | 108 |
| <i>desulphobacterium</i> | GDNSTAALLFQDDEALENNLHSLAQKTSILTSAIYRADGARVASFSRGGHQQISP----- | 111 |
| <i>geobacter</i>         | GANSASALVEFDPEAQRITIAPLASKRSILAVYVLTSEGQIMARHVAPEAGNAELPLERL | 120 |
|                          | :.:* : : . : : : : *                                         |     |

YfiR

|                          |                                                               |     |
|--------------------------|---------------------------------------------------------------|-----|
| PA01 YfiR                | IFSIVRWPKEPAV-----LQLCVVGPTEYADGLLRGMVQANGRRVHAERRAVDNPDLGTL  | 109 |
| <i>opitutis</i>          | FARFVEWPRDVAAQ-ADEVVIGVLGADPFGLYLDEVLRGQKVNHALVVKRYGSVAEIDR   | 115 |
| <i>acidobacteria</i>     | FGAFVQWPASVAP--SDDFSICVLGRDGFSGVLDSTINGESIEGKKLVALRVNSVREAAQ  | 117 |
| <i>geobacter</i>         | MSKYIEWPAEAFPRGTGAPLQICSVGRPFAAALEQYQ-GKTVLGHQLSLRRLAVGDEPAE  | 105 |
| <i>rhodothermus</i>      | FAQFSTWPEEALGDAATPIRLCILGKDPFGSALEQLQ-GKTVHNRPLEIRHLPVGASARG  | 102 |
| <i>desulphobacterium</i> | FAFKIKWPGPTFIHEKSPLLIGVMGDDSFADKLGPLT-SRTVNRNPFIEIKKLKTSKQAQT | 112 |
|                          | : : ** . : :* :. *                                            |     |

|                          |                                                                |     |
|--------------------------|----------------------------------------------------------------|-----|
| PA01 YfiR                | CNVIYLGVVDERERQQVFRSLAGHPVLSISERGTECSVSGSMFCLNVGGPFIITFEANLDSI | 169 |
| <i>opitutis</i>          | CHVLFMSGSEGERAEPILOALRTRPILTVCDTNAFARHGAMIHLVMDQQFVRLRINLDAA   | 175 |
| <i>acidobacteria</i>     | CRILYISNSEESRLRGILVELAKAPVLTVSDIPHADRGGMIEFTLQSGFVRFQVNVTRA    | 177 |
| <i>geobacter</i>         | CHVLVVSQVEKRYLAGVLDQARRDALTVGDIPDFARFGGIIGFVENEQFVRFVINLKAA    | 165 |
| <i>rhodothermus</i>      | CHLVFMGPMKQVQLQTSLKQLQNPVLTVGEGEDFLKQGGMVRLVEEKNFIQFEINITAA    | 162 |
| <i>desulphobacterium</i> | CHMVYINTSSSAELSNILEQLKARPIITVGDNNKFAAQGGIIQFIKIRDFLRFIINLDAA   | 172 |
|                          | *.: : . : : : : *.: : * : *                                    |     |

|                          |                            |     |
|--------------------------|----------------------------|-----|
| PA01 YfiR                | ARSGVRVHPSVLKLAARRQATP---- | 190 |
| <i>opitutis</i>          | RQAGLVISSKLLFTAEIVTDSEGMR  | 200 |
| <i>acidobacteria</i>     | ERAGLTLSSQLLKVAANVKHDEARD  | 202 |
| <i>geobacter</i>         | QQSRVRISSQLLKLAKLIREGDQ--  | 188 |
| <i>rhodothermus</i>      | RRAGLQLSARLLFLARIYEEAG---  | 184 |
| <i>desulphobacterium</i> | KINQVQIDAQLLSLATELLETKE--  | 195 |
|                          | : : . : * *                |     |
