# Supplementary material for: The YfiBNR Signal Transduction Mechanism Reveals Novel Targets for the Evolution of Persistent Pseudomonas aeruginosa in Cystic Fibrosis Airways
Source: PubMed Central journal article supplement (PMC3375315; doi:10.1371/journal.ppat.1002760), 2012-06-14
Supplement: ppat.1002760.s006.pdf [file ppat.1002760.s006.pdf]

**Table S1. Bacterial strains and plasmids used in this study.**

| Name                                                                | Description                                                                                                                                                                                                                                | Reference  |
|---------------------------------------------------------------------|--------------------------------------------------------------------------------------------------------------------------------------------------------------------------------------------------------------------------------------------|------------|
| <b><i>P. aeruginosa</i></b>                                         |                                                                                                                                                                                                                                            |            |
| PA01                                                                | Wild-type <i>P. aeruginosa</i>                                                                                                                                                                                                             | [1]        |
| $\Delta yfiR$                                                       | PA01 with <i>yfiR</i> deleted                                                                                                                                                                                                              | [2]        |
| $\Delta yfiNR$                                                      | PA01 with <i>yfiNR</i> deleted                                                                                                                                                                                                             | [2]        |
| $\Delta yfiBNR$                                                     | PA01 with <i>yfiBNR</i> deleted                                                                                                                                                                                                            | [2]        |
| $\Delta yfiBNR$ Tn7:: <i>yfiNR</i>                                  | $\Delta yfiBNR$ with <i>yfiNR</i> genes inserted at the Att::Tn7 locus                                                                                                                                                                     | [2]        |
| PA01 <i>yfiR</i> -M2                                                | $\Delta yfiR$ with <i>yfiR</i> -flag inserted at the Att::Tn7 locus                                                                                                                                                                        | [2]        |
| $\Delta yfiBN$ <i>yfiR</i> -M2                                      | $\Delta yfiBNR$ with <i>yfiR</i> -flag inserted at the Att::Tn7 locus                                                                                                                                                                      | [2]        |
| $\Delta yfiN$ <i>yfiR</i> -M2                                       | $\Delta yfiNR$ with <i>yfiR</i> -flag inserted at the Att::Tn7 locus                                                                                                                                                                       | [2]        |
| PA01 Tn7:: <i>yfiRN</i> -flag                                       | PA01 with <i>yfiRN</i> -flag inserted at the Att::Tn7 locus                                                                                                                                                                                | This study |
| $\Delta yfiNR$ Tn7:: <i>yfiRN</i> -flag                             | $\Delta yfiNR$ with <i>yfiRN</i> -flag inserted at the Att::Tn7 locus                                                                                                                                                                      | This study |
| $\Delta dsbA$                                                       | PA01 with <i>dsbA</i> deleted                                                                                                                                                                                                              | This study |
| $\Delta dsbA \Delta yfiBNR$                                         | $\Delta yfiBNR$ with <i>dsbA</i> deleted                                                                                                                                                                                                   | This study |
| $\Delta dsbA \Delta yfiB$                                           | $\Delta dsbA \Delta yfiBNR$ with <i>yfiNR</i> genes inserted at the Att::Tn7 locus                                                                                                                                                         | This study |
| <i>wspR</i> ::Tn5                                                   | Tn5 insertion in <i>wspR</i>                                                                                                                                                                                                               | This study |
| $\Delta dsbA$ <i>wspR</i> ::Tn5                                     | $\Delta dsbA$ with Tn5 insertion in <i>wspR</i>                                                                                                                                                                                            | This study |
| Clin110                                                             | SCV strain isolated from CF sputum                                                                                                                                                                                                         | [2]        |
| Clin163                                                             | Smooth strain isolated from CF sputum. Descendent of Clin110                                                                                                                                                                               | This study |
| $\Delta yfiBNR$ Tn7:: <i>yfiBNR</i><br>Clinical <i>yfiN</i> alleles | $\Delta yfiBNR$ with <i>yfiBNR</i> genes inserted at the Att::Tn7 locus. <i>yfiN</i> present in four alleles containing combinations of G173D and $\Delta 255-7$ mutations                                                                 | This study |
| SCV20265                                                            | SCV strain isolated from CF sputum                                                                                                                                                                                                         | [3]        |
| WT20265                                                             | Smooth precursor of SCV20265, isolated from CF sputum                                                                                                                                                                                      | [3]        |
| <b><i>E. coli</i></b>                                               |                                                                                                                                                                                                                                            |            |
| DH5 $\alpha$                                                        | <i>endA1</i> , <i>hsdR17</i> (r <sub>K</sub> -m <sub>K</sub> +), <i>supE44</i> , <i>recA1</i> , <i>gyrA</i> (Nal <sup>r</sup> ), <i>relA1</i> , $\Delta$ ( <i>lacIZYA-argF</i> )U169, <i>deoR</i> , $\Phi 80dlac\Delta$ ( <i>lacZ</i> )M15 | [4]        |
| DY330                                                               | W3110 $\Delta lacU169$ <i>gal490</i> $\lambda cl857$ $\Delta$ ( <i>cro-bioA</i> )                                                                                                                                                          | [5]        |
| XL1-red                                                             | F- <i>endA1</i> <i>gyrA96</i> ( <i>nalR</i> ) <i>thi-1</i> <i>relA1</i> <i>lac</i> <i>glnV44</i> <i>hsdR17</i> (r <sub>K</sub> - m <sub>K</sub> +) <i>mutS</i> <i>mutT</i> <i>mutD5</i> Tn10                                               | Stratagene |
| <b>Plasmids</b>                                                     |                                                                                                                                                                                                                                            |            |
| pME6032                                                             | Tet <sup>R</sup> , P <sub>K</sub> , 9.8 kb pVS1 derived shuttle vector                                                                                                                                                                     | [6]        |
| pME6032-Gm                                                          | Gm <sup>R</sup> , pME6032 based vector, Tet cassette replaced with <i>aacCI</i> gentamycin resistance cassette                                                                                                                             | This study |
| pME- <i>araC</i>                                                    | Tet <sup>R</sup> , pME6032 with the <i>lac</i> -promoter and <i>lacI</i> replaced with the <i>araC</i> -pBAD promoter fragment from pBAD18s                                                                                                | [2]        |
| pME- <i>araC-yfiR</i>                                               | Tet <sup>R</sup> , pME- <i>araC</i> containing <i>YfiR</i> under control of <i>ara</i> -promoter as EcoRI-BglII fragment                                                                                                                   | [2]        |
| pME6032- <i>yfiB</i>                                                | pME6032 with <i>yfiB</i> as EcoRI-BglII fragment                                                                                                                                                                                           | [2]        |
| pBV-PA5295                                                          | pBV-MCS4 with PA5295 under the control of vanillate promoter                                                                                                                                                                               | [2]        |

|                                              |                                                                                                                                                 |            |
|----------------------------------------------|-------------------------------------------------------------------------------------------------------------------------------------------------|------------|
| pBV-PA5295 <sub>E328A</sub>                  | pBV-MCS4 with PA5292 <sub>E328A</sub> under the control of vanillate promoter                                                                   | [2]        |
| Activated <i>yfiB</i> mutants                | 20 pME6032- <i>yfiB</i> variants with activating mutations in <i>yfiB</i> (see Table 3)                                                         | This study |
| pGm- <i>yfiB</i> prom- <i>N</i>              | pME6032-Gm with <i>yfiN</i> as <i>Bam</i> HI-blunt fragment, <i>yfiN</i> expressed from the native promoter                                     | This study |
| pGm- <i>yfiB</i> prom- <i>N</i> - constructs | pME6032-Gm with <i>yfiN</i> alleles as <i>Bam</i> HI- <i>Nco</i> I fragments, containing single point mutations                                 | This study |
| YfiR-insensitive YfiN mutants                | 20 pGm- <i>yfiB</i> prom- <i>N</i> variants with YfiR-insensitive mutations in <i>yfiN</i> (see Table 1 and Fig.7C)                             | This study |
| pMR- <i>yfiR</i> -flag                       | pMR20- <i>yfiR</i> -M2 with lac promoter replaced by FRT scar sequence                                                                          | This study |
| Compensatory YfiR mutants                    | 14 pMR- <i>yfiR</i> -flag variants with compensatory mutations in <i>yfiR</i> (see Table 2 and Fig. 7C)                                         | This study |
| pME- <i>yfiB</i> -PG - constructs            | pME6032- <i>yfiB</i> with <i>yfiB</i> D102A,G105A ( $\pm$ F48S, L43P) as <i>Eco</i> RI- <i>Asc</i> I fragments                                  | This study |
| pME- <i>yfiB</i> -LA - constructs            | pME6032 containing <i>yfiR</i> residues 1-42 fused to <i>yfiB</i> ( $\pm$ D102A,G105A) residues 26-169 as <i>Eco</i> RI- <i>Bgl</i> II fragment | This study |
| pME- <i>yfiB</i> short/long constructs       | pME6032 with <i>yfiB</i> short/long linker alleles as <i>Eco</i> RI- <i>Bgl</i> II fragments                                                    | This study |
| pME- <i>yfiB</i> constructs                  | pME6032 with <i>yfiB</i> alleles as <i>Eco</i> RI- <i>Bgl</i> II fragments, containing single point mutations                                   | This study |
| pME- <i>dsbA</i>                             | pME6032 with <i>dsbA</i> as <i>Eco</i> RI- <i>Kpn</i> I fragment                                                                                | This study |
| pME3087                                      | Tet <sup>R</sup> , suicide vector for allelic replacement; <i>ColE1</i> -replicon, <i>IncP-1</i> , <i>Mob</i>                                   | [7]        |
| pME3087- $\Delta$ <i>dsbA</i>                | pME3087 with <i>dsbA</i> deletion cassette as <i>Hind</i> III- <i>Bam</i> HI fragment                                                           | This study |
| pMR20                                        | Tet <sup>R</sup> , low copy number and broad host-range vector                                                                                  | [8]        |
| pMR20- <i>yfiB</i> NR                        | pMR20 with <i>yfiB</i> NR as <i>Hind</i> III- <i>Bam</i> HI fragment                                                                            | [2]        |
| pMR20- <i>yfiR</i> -M2                       | pMR20 with <i>yfiR</i> -flag as <i>Hind</i> III- <i>Bam</i> HI fragment                                                                         | [2]        |
| pMR20- <i>yfiR</i> -M2 - constructs          | pMR20 with <i>yfiR</i> -flag alleles as <i>Hind</i> III- <i>Bam</i> HI fragments, containing single point mutations                             | This study |
| pMR20- <i>yfiR</i> N-flag                    | pMR20 with <i>yfiR</i> N-flag as <i>Hind</i> III- <i>Bam</i> HI fragment                                                                        | This study |
| pUC18T-mini-Tn7T-Gm                          | Amp <sup>R</sup> , Gm <sup>R</sup> , Tn7 insertion vector                                                                                       | [9]        |
| pTn7- <i>yfiR</i> -M2                        | pUC18T-mini-Tn7T with <i>yfiR</i> -flag as <i>Hind</i> III- <i>Bam</i> HI fragment                                                              | [2]        |
| pTn7- <i>yfiR</i> N-flag                     | pUC18T-mini-Tn7T with <i>yfiR</i> N-flag as <i>Hind</i> III- <i>Bam</i> HI fragment                                                             | This study |
| pTn7- <i>yfiB</i> NR                         | Vector for complementation of entire <i>yfiB</i> NR operon at Tn7 locus                                                                         | [2]        |
| pTn7- <i>yfiB</i> N-G173D-R                  | Vector for complementation of <i>yfiB</i> NR operon with <i>yfiN</i> G173D mutation                                                             | This study |
| pTn7- <i>yfiB</i> N- $\Delta$ 255-7-R        | Vector for complementation of <i>yfiB</i> NR operon with <i>yfiN</i> $\Delta$ 255-7 mutation                                                    | This study |
| pTn7- <i>yfiB</i> N20265-R                   | Vector for complementation of <i>yfiB</i> NR operon with SCV20265 <i>yfiN</i> allele                                                            | This study |
| pTNS2                                        | Amp <sup>R</sup> , helper plasmid for Tn7 integration events                                                                                    | [9]        |
| pFLP2                                        | Amp <sup>R</sup> , FRT cassette excision vector                                                                                                 | [10]       |

## References

1. Holloway BW (1955) Genetic recombination in *Pseudomonas aeruginosa*. *J Gen Microbiol* 13: 572-581.
2. Malone JG, Jaeger T, Spangler C, Ritz D, Spang A, et al. (2010) YfiBNR mediates cyclic di-GMP dependent small colony variant formation and persistence in *Pseudomonas aeruginosa*. *PLoS Pathog* 6: e1000804.
3. Meissner A, Wild V, Simm R, Rohde M, Erck C, et al. (2007) *Pseudomonas aeruginosa* cupA-encoded fimbriae expression is regulated by a GGDEF and EAL domain-dependent modulation of the intracellular level of cyclic diguanylate. *Environ Microbiol* 9: 2475-2485.
4. Woodcock DM, Crowther PJ, Doherty J, Jefferson S, DeCruz E, et al. (1989) Quantitative evaluation of *Escherichia coli* host strains for tolerance to cytosine methylation in plasmid and phage recombinants. *Nucleic Acids Res* 17: 3469-3478.
5. Yu D, Ellis HM, Lee EC, Jenkins NA, Copeland NG, et al. (2000) An efficient recombination system for chromosome engineering in *Escherichia coli*. *Proc Natl Acad Sci U S A* 97: 5978-5983.
6. Heeb S, Itoh Y, Nishijyo T, Schnider U, Keel C, et al. (2000) Small, stable shuttle vectors based on the minimal pVS1 replicon for use in gram-negative, plant-associated bacteria. *Mol Plant Microbe Interact* 13: 232-237.
7. Voisard C, Bull CT, Keel C, Laville J, Maurhofer M, et al. (1994) Biocontrol of root diseases by *Pseudomonas fluorescens* CHA0: current concepts and experimental approaches. In: O'Gara F, Dowling DN, Boesten B, editors. *Molecular Ecology of Rhizosphere Microorganisms*. Weinheim, Germany: Wiley-VCH. pp. 67-89.
8. Roberts RC, Mohr CD, Shapiro L (1996) Developmental programs in bacteria. *Curr Top Dev Biol* 34: 207-257.
9. Choi KH, Gaynor JB, White KG, Lopez C, Bosio CM, et al. (2005) A Tn7-based broad-range bacterial cloning and expression system. *Nat Methods* 2: 443-448.
10. Hoang TT, Karkhoff-Schweizer RR, Kutchma AJ, Schweizer HP (1998) A broad-host-range Flp-FRT recombination system for site-specific excision of chromosomally-located DNA sequences: application for isolation of unmarked *Pseudomonas aeruginosa* mutants. *Gene* 212: 77-86.
