# Supplementary material for: The YfiBNR Signal Transduction Mechanism Reveals Novel Targets for the Evolution of Persistent Pseudomonas aeruginosa in Cystic Fibrosis Airways
Source: PubMed Central journal article supplement (PMC3375315; doi:10.1371/journal.ppat.1002760), 2012-06-14
Supplement: ppat.1002760.s007.pdf [file ppat.1002760.s007.pdf]

**Table S2. Primers used in this study.**

| <b>Primer Name</b> | <b>Role</b>                  | <b>Sequence</b>                                                    |
|--------------------|------------------------------|--------------------------------------------------------------------|
| A                  | <i>yfiN</i> -FLAG For        | GAAAAGGAGATAGACAGTGTCTACCCAGAGGCTCCACCCAAGGACTACAAAGACCATGACGG     |
| B                  | <i>yfiN</i> -FLAG Rev        | TACTCGGCGGGAACGATGATGGCGACGCGGCGTTCTCGCATATGAATATCCTCCTTAG         |
| C                  | Chlor For                    | CGCGCGTTGGCCGATTCATTAATGCAGCTGGCACGACAGGTGTGTAGGCTGGAGCTGCTTC      |
| D                  | Chlor Rev                    | TCTATTAAGGTCATTCAAAGGTCATCCACCGGATCTATCATATGAATATCCTCCTTAG         |
| E                  | Gent For                     | GAGGATCCATTAAGCATTCTGCCGAC                                         |
| F                  | Gent Rev                     | CGTCTAGATGACGGAACAGCGGGAAG                                         |
| G                  | <i>yfiR</i> For              | CCGAAGCTTGCCGCCCTG                                                 |
| H                  | <i>yfiN</i> Rev              | GCGGATCCTCTACTTGGGTGG                                              |
| I                  | <i>yfiB</i> For              | GAGAATTCGTGTACCCAG                                                 |
| J                  | <i>yfiB</i> Rev              | GAGGATCCGATTACTCGGCG                                               |
| K                  | DsbA For                     | GATCAGAATTCTAGGAGTGAACGATGC                                        |
| L                  | DsbA Rev                     | GATCGGTACCTTGCCTACTTCTTGG                                          |
| M                  | <i>yfiN</i> Seq 1            | CCCAACCAGCAACTGATC                                                 |
| N                  | <i>yfiN</i> Seq 2            | TGCTTTCCCGATGCCAAC                                                 |
| O                  | <i>yfiN</i> Seq 3            | GTCTATCTCCTTTTCTC                                                  |
| P                  | <i>yfiR</i> Rev              | GAGGATCCATCACGGAGTGGC                                              |
| Q                  | $\Delta$ <i>dsbA</i> UpFor   | GATCGGAATAAGCTTGATGTG                                              |
| R                  | $\Delta$ <i>dsbA</i> UpRev   | GGAAGAAATGGCCCATATGCTCGCCG                                         |
| S                  | $\Delta$ <i>dsbA</i> DownFor | GGTGAGAATCATATGACGCATCGTTCACTCCTAGG                                |
| T                  | $\Delta$ <i>dsbA</i> DownRev | GTGAGTCTGCTGTGGATCCTGGGTCTG                                        |
| U                  | <i>yfiB</i> PG- Rev          | TCGGCGCGCCGTTCCGGAGAGCTTTTGATTGTAGCCTTCGTCGGCGTAGTTGGCGGTGTGGCCTTC |
| V                  | <i>yfiR</i> LAFus For        | CTCTCTCAATTGTTGCCTTCGTTGCCAC                                       |
| W                  | <i>yfiB</i> LAFus For        | CTCGACGTCGTGCCAGACCAAGC                                            |
| X                  | <i>yfiB</i> long For         | GCCTGAGCACCAAGCCGCCGACACCGCCTGAGCGCCGAGCAGATCG                     |
| Y                  | <i>yfiB</i> long Rev         | GTCTGCGGCGCTTGGTGTCTAGGCCGGTCTGCGGCGGCTTGGTCTGG                    |
| Z                  | <i>yfiB</i> short For        | CTGGCCGGTTGCCAGACCGCCTGAGCGCCGAGCAGATCG                            |
| AA                 | <i>yfiB</i> short Rev        | CGATCTGCTCGGCGCTCAGGCCGTCTGGCAACCGGCCAG                            |
| AB                 | <i>yfiB</i> G70A For         | CTTGTGCTGGGCCTAGCCGGTTGCCAG                                        |
| AC                 | <i>yfiB</i> G70A Rev         | CTGGCAACCGGCTAGGCCAGCACAAG                                         |
| AD                 | <i>yfiB</i> A224C For        | GTCTCAATCCCGCCAGCCGCAACAC                                          |
| AE                 | <i>yfiB</i> A224C Rev        | GTGTTGCGGCTGGCGGGATTGAGAC                                          |
| AF                 | <i>yfiB</i> G254A For        | CCAAGATCGCCACGCCCTGCTC                                             |
| AG                 | <i>yfiB</i> G254A Rev        | CGAGCAGGGCGTGGGCGATCTTGG                                           |
| AH                 | <i>yfiB</i> For              | GAAACAGAATTCGTGTCTACCCAGAG                                         |
| AI                 | <i>yfiB</i> Rev              | GATCAGATCTGATTACTCGGCGGGAACGATGATGG                                |
| AJ                 | <i>yfiN</i> A301C For        | GACAGCCCCTGGCCAGTTGGCATC                                           |
| AK                 | <i>yfiN</i> A301C Rev        | CAACTGGCCAGGGGCTGTC                                                |
| AL                 | <i>yfiN</i> G667A For        | CTGGGCGAGAACTTCAACG                                                |
| AM                 | <i>yfiN</i> G667A Rev        | CGTTGAAGTTCTCGCCAG                                                 |
| AN                 | <i>yfiN</i> C679A For        | GGACTTCAACGCCATGCTCGACG                                            |
| AO                 | <i>yfiN</i> C679A Rev        | CGTCGAGCATGGCGTTGAAGTCC                                            |
| AP                 | <i>yfiN</i> A824G For        | CTGCGCGATGCCAGCGAGCATCG                                            |
| AQ                 | <i>yfiN</i> A824G Rev        | CTCGCGATGCTCGCTGGCATCGCGCAG                                        |
| AR                 | <i>yfiN</i> For              | GATCCCATGGTTGCCGCCCTGATAAAGG                                       |
| AS                 | <i>YfiN</i> Rev              | CTTAATGGATCCTCTACTTGGGTGGAGC                                       |
| AT                 | <i>yfiR</i> T76C For         | CTGGCGGTTTCCCGCCTGGG                                               |
| AU                 | <i>yfiR</i> T76C Rev         | CCCAGGCGGGAAACCGCCA                                                |
| AV                 | <i>yfiR</i> G383A For        | CAGCAGGTGTTCCACAGCCTGG                                             |
| AW                 | <i>yfiR</i> G383A Rev        | CCAGGCTGTGGAACACCTGC                                               |
| AX                 | <i>yfiR</i> G391A For        | GTGTTCCGCAGCCTGACCGGGCATC                                          |
| AY                 | <i>yfiR</i> G391A Rev        | GATGCCCGGTCAGGCTGCGGAACA                                           |
| AZ                 | <i>yfiR</i> -mut For         | GATCAAGCTTGCCGCCCTGATAAAGGTC                                       |
| BA                 | <i>yfiR</i> -FLAG Rev        | CCATGAGCTCGGATCCGCGTTACTATTTATCGTCGTCATC                           |
