# Supplementary material for: The YfiBNR Signal Transduction Mechanism Reveals Novel Targets for the Evolution of Persistent Pseudomonas aeruginosa in Cystic Fibrosis Airways
Source: PubMed Central journal article supplement (PMC3375315; doi:10.1371/journal.ppat.1002760), 2012-06-14
Supplement: ppat.1002760.s008.pdf [file ppat.1002760.s008.pdf]

**Table S3. Single nucleotide polymorphism (SNP) positions in the sequences of clinical SCVs, compared to *P. aeruginosa* PA01.**

| Locus    | Nucleotide position | AA position | PA01 nucleotide | SNP | PA01 AA | SNP AA | SCV Pool 1 | SCV Pool 2 | SCV Pool 3 | WT20265 | SCV20265 | Clin110 (SCV) | Clin163 (Smooth) | Notes          |
|----------|---------------------|-------------|-----------------|-----|---------|--------|------------|------------|------------|---------|----------|---------------|------------------|----------------|
| Upstream | -182                | 0           | G               | A   |         |        | X          | X          |            |         |          |               |                  |                |
| Upstream | -171                | 0           | G               | A   |         |        |            | X          |            |         |          |               |                  |                |
| Upstream | -138                | 0           | G               | T   |         |        | X          | X          | X          |         |          |               |                  |                |
| Upstream | -115                | 0           | G               | A   |         |        | X          | X          | X          |         |          |               |                  |                |
| Upstream | -109                | 0           | T               | C   |         |        | X          | X          | X          |         |          |               |                  |                |
| Upstream | -34                 | 0           | C               | T   |         |        | X          | X          | X          |         |          |               |                  |                |
| YfiR     | 76                  | 26          | T               | C   | C       | R      |            | X          |            |         |          |               |                  | SCV inducing   |
| YfiR     | 121                 | 41          | A               | G   | I       | V      | X          | X          | X          | X       | X        | X             | X                | Untested       |
| YfiR     | 138                 | 46          | T               | C   | N       | N      | X          | X          | X          |         |          |               |                  |                |
| YfiR     | 192                 | 64          | G               | A   | E       | E      | X          | X          | X          |         |          |               |                  |                |
| YfiR     | 201                 | 67          | C               | T   | V       | V      |            | X          | X          |         |          |               |                  |                |
| YfiR     | 222                 | 74          | A               | C   | G       | G      |            | X          |            |         |          |               |                  |                |
| YfiR     | 383                 | 128         | G               | A   | R       | H      | X          | X          |            |         |          |               |                  | No effect seen |
| YfiR     | 391                 | 131         | G               | A   | A       | T      | X          | X          |            |         |          |               |                  | No effect seen |
| YfiR     | 405                 | 135         | G               | C   | V       | V      | X          | X          | X          | X       | X        | X             | X                |                |
| YfiR     | 423                 | 141         | C               | T   | R       | R      | X          | X          | X          | X       | X        | X             | X                |                |
| YfiR     | 471                 | 157         | C               | T   | G       | G      | X          | X          | X          |         |          |               |                  |                |
| YfiN     | 63                  | 21          | G               | A   | A       | A      | X          |            | X          | X       | X        | X             | X                |                |
| YfiN     | 108                 | 36          | G               | A   | A       | A      |            | X          |            |         |          |               |                  |                |
| YfiN     | 144                 | 48          | T               | C   | Y       | Y      | X          | X          | X          |         |          |               |                  |                |
| YfiN     | 147                 | 49          | C               | G   | A       | A      | X          | X          |            |         |          |               |                  |                |
| YfiN     | 195                 | 65          | G               | A   | E       | E      | X          | X          |            | X       | X        | X             | X                |                |
| YfiN     | 201                 | 67          | G               | A   | A       | A      | X          |            |            | X       | X        | X             | X                |                |
| YfiN     | 234                 | 78          | G               | A   | E       | E      | X          | X          |            |         |          |               |                  |                |
| YfiN     | 259                 | 87          | G               | A   | E       | K      |            |            |            |         |          | X             | X                | SCV inducing   |
| YfiN     | 294                 | 98          | G               | A   | Q       | Q      |            | X          |            |         |          |               |                  |                |
| YfiN     | 297                 | 99          | A               | G   | G       | G      |            | X          |            |         |          |               |                  |                |
| YfiN     | 301                 | 101         | A               | C   | T       | P      |            | X          |            |         |          |               |                  | No effect seen |
| YfiN     | 312                 | 104         | T               | C   | S       | S      |            | X          |            |         |          |               |                  |                |
| YfiN     | 438                 | 146         | G               | A   | K       | K      |            | X          | X          |         |          |               |                  |                |
| YfiN     | 474                 | 158         | C               | A   | T       | T      | X          |            | X          | X       | X        | X             | X                |                |
| YfiN     | 518                 | 173         | G               | A   | G       | D      | X          |            |            |         | X        |               |                  | SCV inducing   |
| YfiN     | 534                 | 178         | G               | A   | S       | S      |            | X          |            |         |          |               |                  |                |
| YfiN     | 667                 | 223         | G               | A   | D       | N      | X          |            |            |         |          |               |                  | SCV inducing   |
| YfiN     | 679                 | 227         | C               | A   | L       | M      | X          |            |            |         |          |               |                  | SCV inducing   |
| YfiN     | 712                 | 238         | C               | T   | L       | L      |            | X          |            |         |          |               |                  |                |
| YfiN     | 765                 | 255-7       | TSL deleted     |     |         |        |            |            |            |         | X        |               |                  | Inactivating   |

|      |      |     |   |   |   |   |   |   |   |   |   |   |   |                |
|------|------|-----|---|---|---|---|---|---|---|---|---|---|---|----------------|
| YfiN | 824  | 275 | A | G | N | S |   | X | X |   |   |   |   | No effect seen |
| YfiN | 831  | 277 | T | C | H | H |   | X | X |   |   |   |   |                |
| YfiN | 849  | 283 | G | A | V | V |   | X | X |   |   |   |   |                |
| YfiN | 870  | 290 | C | T | R | R | X | X |   |   |   |   |   |                |
| YfiN | 984  | 328 | C | T | G | G | X | X | X |   |   |   |   |                |
| YfiN | 985  | 329 | G | T | G | C |   |   |   |   |   |   | X | Inactivating   |
| YfiN | 1002 | 334 | C | G | V | V | X | X | X |   |   |   |   |                |
| YfiN | 1011 | 337 | A | G | A | A |   |   | X |   |   |   |   |                |
| YfiN | 1101 | 367 | T | G | T | T | X | X | X | X | X | X | X |                |
| YfiN | 1113 | 371 | A | G | S | S | X | X | X | X | X | X | X |                |
| YfiN | 1146 | 382 | T | C | H | H | X | X | X |   |   |   |   |                |
| YfiN | 1188 | 396 | G | A | A | A |   |   |   |   |   | X | X |                |
| YfiN | 1222 | 408 | C | A | R | R |   | X |   |   |   |   |   |                |
| YfiB | 36   | 12  | C | T | L | L | X | X | X | X | X | X | X |                |
| YfiB | 66   | 22  | C | T | G | G | X | X | X |   |   |   |   |                |
| YfiB | 69   | 23  | G | C | L | L |   |   | X |   |   |   |   |                |
| YfiB | 70   | 24  | G | A | A | T | X | X | X |   |   |   |   | No effect seen |
| YfiB | 87   | 29  | G | A | K | K |   | X | X |   |   |   |   |                |
| YfiB | 180  | 60  | G | C | S | S | X | X | X | X |   |   |   |                |
| YfiB | 207  | 69  | C | A | L | L | X | X | X | X | X | X | X |                |
| YfiB | 224  | 75  | A | C | D | A | X |   | X |   |   |   |   | No effect seen |
| YfiB | 243  | 81  | C | G | T | T | X | X | X |   |   |   |   |                |
| YfiB | 254  | 85  | G | A | R | H |   | X | X |   |   |   |   | No effect seen |
| YfiB | 259  | 87  | C | T | L | L | X | X | X |   |   |   |   |                |
| YfiB | 330  | 110 | T | C | N | N |   | X | X |   |   |   |   |                |
| YfiB | 333  | 111 | A | G | Q | Q |   | X | X |   |   |   |   |                |
| YfiB | 363  | 121 | G | A | V | V |   | X |   |   |   |   |   |                |
| YfiB | 372  | 124 | A | G | V | V |   | X |   |   |   |   |   |                |
| YfiB | 420  | 140 | T | G | L | L |   | X |   |   |   |   |   |                |
| YfiB | 435  | 145 | C | G | P | P | X | X |   | X | X | X | X |                |

Non-synonymous mutations are marked in blue. 'X' indicates the presence of a particular mutation in the sequence indicated. The YfiR I41V substitution was ubiquitous among the sequenced strains, suggesting that valine is the ancestral residue at this position and a V to I substitution occurred in PA01.
