# Supplementary material for: The YfiBNR Signal Transduction Mechanism Reveals Novel Targets for the Evolution of Persistent Pseudomonas aeruginosa in Cystic Fibrosis Airways
Source: PubMed Central journal article supplement (PMC3375315; doi:10.1371/journal.ppat.1002760), 2012-06-14
Supplement: ppat.1002760.s009.pdf [file ppat.1002760.s009.pdf]

**Table S4. Identification of YfiBNR homologs in other systems.**

| Genus                   | yfiBNR    | yfiRN, yfiB elsewhere | yfiNB, no yfiR | Notes                                                                |
|-------------------------|-----------|-----------------------|----------------|----------------------------------------------------------------------|
| <i>Accumulibacter</i>   | 0         | 1                     | 0              |                                                                      |
| <i>Acidobacteria</i>    | 0         | 1                     | 0              | 'YfiN' has histidine kinase output domain                            |
| <i>Acinetobacter</i>    | 7         | 0                     | 0              |                                                                      |
| <i>Aeromonas</i>        | 2         | 0                     | 0              |                                                                      |
| <i>Alcanivorax</i>      | 0         | 0                     | 1              |                                                                      |
| <i>Alicyclophilus</i>   | 1         | 0                     | 0              |                                                                      |
| <i>Alkalilimnicola</i>  | 0         | 0                     | 1              |                                                                      |
| <i>Burkholderia</i>     | 9         | 0                     | 0              |                                                                      |
| <i>Citrobacter</i>      | 2         | 0                     | 0              |                                                                      |
| <i>Cupriavidus</i>      | 2         | 0                     | 0              |                                                                      |
| <i>Dechloromonas</i>    | 0         | 1                     | 0              | 'YfiN' has histidine kinase output domain, operon contains cdG genes |
| <i>Delftia</i>          | 1         | 0                     | 0              |                                                                      |
| <i>Desulfobacterium</i> | 0         | 1                     | 0              | 'YfiN' output is a BarA homolog                                      |
| <i>Desulfovibrio</i>    | 0         | 0                     | 1              |                                                                      |
| <i>Dickeya</i>          | 0         | 2                     | 0              | No YfiB present in operon, otherwise similar to PA01 YfiNR           |
| <i>Edwardsiella</i>     | 1         | 0                     | 0              |                                                                      |
| <i>Enterobacter</i>     | 3         | 0                     | 0              |                                                                      |
| <i>Escherichia</i>      | 32        | 0                     | 0              |                                                                      |
| <i>Geobacter</i>        | 0         | 1                     | 1              | 'YfiN' has GGDEF-EAL output domains                                  |
| <i>Hahella</i>          | 0         | 0                     | 1              |                                                                      |
| <i>Kangiella</i>        | 0         | 0                     | 1              |                                                                      |
| <i>Klebsiella</i>       | 4         | 0                     | 0              |                                                                      |
| <i>Leptothrix</i>       | 0         | 1                     | 0              |                                                                      |
| <i>Methylothera</i>     | 0         | 0                     | 1              |                                                                      |
| <i>Methylovorus</i>     | 2         | 0                     | 0              |                                                                      |
| <i>Opitutus</i>         | 0         | 1                     | 0              | 'YfiN' has histidine kinase output domain                            |
| <i>Pantoea</i>          | 2         | 0                     | 0              |                                                                      |
| <i>Polaromonas</i>      | 0         | 1                     | 0              | 'YfiN' has MCP output domain                                         |
| <i>Pseudomonas</i>      | 12        | 0                     | 0              |                                                                      |
| <i>Ralstonia</i>        | 2         | 1                     | 0              |                                                                      |
| <i>Rhodothermus</i>     | 0         | 1                     | 0              | 'YfiN' has histidine kinase output domain                            |
| <i>Salmonella</i>       | 0         | 14                    | 0              | No YfiB present in operon, otherwise similar to PA01 YfiNR           |
| <i>Serratia</i>         | 1         | 0                     | 0              |                                                                      |
| <i>Shigella</i>         | 1         | 5                     | 0              | Possibly due to system degradation in some cases                     |
| <i>Sideroxydans</i>     | 0         | 1                     | 0              | 'YfiN' has GGDEF-EAL output domains                                  |
| <i>Sphingobium</i>      | 0         | 1                     | 0              |                                                                      |
| <i>Sphingopyxis</i>     | 1         | 0                     | 0              |                                                                      |
| <i>Sulfuricurvum</i>    | 0         | 0                     | 1              |                                                                      |
| <i>Teredinibacter</i>   | 0         | 1                     | 0              |                                                                      |
| <i>Thauera</i>          | 0         | 1                     | 0              | 'YfiN' has HPT output domain, in an operon with 2 YfiR homologs      |
| <i>Thioalkalivibrio</i> | 0         | 0                     | 1              |                                                                      |
| <i>Xanthomonas</i>      | 0         | 0                     | 1              |                                                                      |
| <i>Xenorhabdus</i>      | 1         | 0                     | 0              |                                                                      |
| <i>Yersinia</i>         | 13        | 0                     | 0              |                                                                      |
| <b>Total</b>            | <b>99</b> | <b>35</b>             | <b>10</b>      |                                                                      |
